# Supplementary material for: A comparative evaluation of the kefir yeast Kluyveromyces marxianus A4 and sulfasalazine in ulcerative colitis: anti-inflammatory impact and gut microbiota modulation
Source: Royal Society of Chemistry journal article supplement (doi:10.1039/d4fo00427b), 2024-01-01
Supplement: d4fo00427b1.pdf [file d4fo00427b1.pdf]

Electronic Supplementary Information

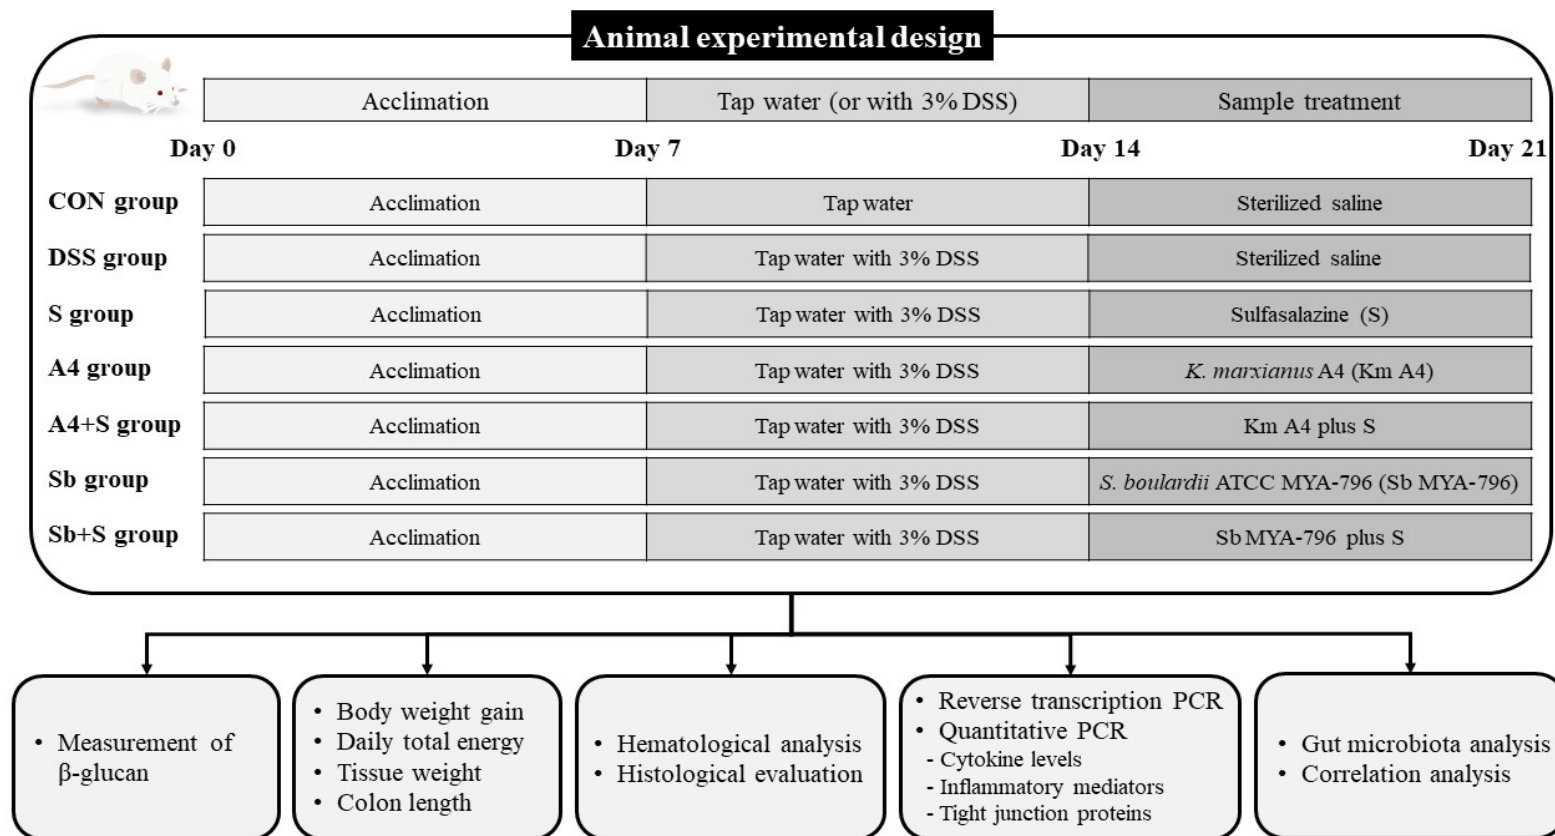

**ESI file 1.** Experimental framework for evaluating the anti-inflammatory effects of combined treatment with *Kluyveromyces marxianus* A4 and sulfasalazine compared to that of *Saccharomyces boulardii* ATCC MYA-796 in mice with dextran sulfate sodium (DSS)-induced colitis. **CON**, control (treated with sterilized saline after providing

autoclaved tap water); **DSS**, DSS-induced model (treated with sterilized saline after providing 3% DSS); **S**, sulfasalazine [treated with sulfasalazine (50 mg/kg/day) after providing 3% DSS]; **A4**, *K. marxianus* A4 (treated with  $1 \times 10^8$  CFU/mL of *K. marxianus* A4 after providing 3% DSS); **A4+S**, *K. marxianus* A4 plus sulfasalazine [treated with  $1 \times 10^8$  CFU/mL of *K. marxianus* A4 plus sulfasalazine (50 mg/kg/day) after providing 3% DSS]; **Sb**, *S. boulardii* ATCC MYA-796 (treated with  $1 \times 10^8$  CFU/mL of *S. boulardii* ATCC MYA-796 after providing 3% DSS); **Sb+S**, *S. boulardii* ATCC MYA-796 plus sulfasalazine [treated with  $1 \times 10^8$  CFU/mL of *S. boulardii* ATCC MYA-796 plus sulfasalazine (50 mg/kg/day) after providing 3% DSS].

**ESI File 2.** Scores for the histological evaluation of colitis.

| <b>Feature</b>          | <b>Score</b> | <b>Description</b>                      | <b>Reference</b> |
|-------------------------|--------------|-----------------------------------------|------------------|
| Inflammation severity   | 0            | None                                    |                  |
|                         | 1            | Mild                                    |                  |
|                         | 2            | Moderate                                |                  |
|                         | 3            | Severe                                  |                  |
| Inflammation extent     | 0            | None                                    |                  |
|                         | 1            | Mucosa                                  |                  |
|                         | 2            | Mucosa and submucosa                    |                  |
|                         | 3            | Transmural                              |                  |
| Crypt damage            | 0            | None                                    | 1                |
|                         | 1            | Basal 1/3 damaged                       |                  |
|                         | 2            | Basal 2/3 damaged                       |                  |
|                         | 3            | Crypts lost; surface epithelium present |                  |
|                         | 4            | Crypts and surface epithelium lost      |                  |
| Percent involvement (%) | 0            | 0                                       |                  |
|                         | 1            | 1–25                                    |                  |
|                         | 2            | 26–50                                   |                  |
|                         | 3            | 51–75                                   |                  |
|                         | 4            | 76–100                                  |                  |

**ESI File 3.** List of primers used to evaluate gene expression.

| Gene            | Forward primer (5'-3')    | Reverse primer (5'-3')    | Accession number |
|-----------------|---------------------------|---------------------------|------------------|
| <i>Gapdh</i>    | CACTCACGGCAAATTCAACGGCAC  | GACTCCACGACATACTCAGCAC    | NM_008084.3      |
| <i>Il-1β</i>    | TCCAGGATGAGGACATGAGCAC    | GAACGTCACACACCAGCAGGTTA   | NM_008361.4      |
| <i>Il-6</i>     | TGACAACCACGGCCTTC         | TTCTGCAAGTGCATCATCG       | NM_031168.2      |
| <i>Tnf-α</i>    | AAGCCTGTAGCCACGTCGTA      | GGCACCACTAGTTGGTTGTCTTTG  | NM_013693.3      |
| <i>Il-12p40</i> | CAGAAGCTAACCATCTCCTGGTTTG | CCGGAGTAATTTGGTGCTCCACAC  | NM_001303244.1   |
| <i>Ifn-γ</i>    | GAAAGCCTAGAAAGTCTGAATAACT | ATCAGCAGCGACTCCTTTCCGCTT  | NM_008337.4      |
| <i>Il-10</i>    | AGAAGCATGGCCAGAAATC       | CCAAGGAGTTGTTCCGTTAGC     | NM_010548.2      |
| <i>Il-4</i>     | AATGTACCAGGAGCCATATCCAC   | TCACTCTGTGGTGTCTTCGT      | NM_021283.2      |
| <i>Cox-2</i>    | CCGTGGTGAATGTATGAGCA      | CCTCGCTTCTGATCTGTCTT      | AY157736.1       |
| <i>inos</i>     | CTGCAGCACTTGGATCAGGAACCTG | GGGAGTAGCCTGTGTGCACCTGGAA | NM_010927.4      |
| <i>Zo-1</i>     | TGGAATTGCAATCTCTGGTG      | CTGGCCCTCCTTTAACACA       | NM_009386.2      |
| <i>Ocln</i>     | GCTGTGATGTGTGTGAGCTG      | GACGGTCTACCTGGAGGAAC      | U49185.1         |
| <i>Cldn-1</i>   | GACTGTTGATGATGGTTATCGG    | AGATGGTAAGGTACAGCCAAGG    | NM_016674.4      |

**Gapdh**, glyceraldehyde 3-phosphate dehydrogenase; **Il**, interleukin; **Tnf-α**, tumor necrosis factor-α; **Ifn-γ**, interferon-γ; **Cox-2**, cyclooxygenase-2; **inos**, inducible nitric

oxide synthase; **Zo-1**, zonula occludens-1; **Ocln**, occludin; **Cldn-1**, claudin-1.

**ESI File 4.** Body weight gain of the mice with dextran sulfate sodium (DSS)-induced colitis treated with sterilized saline, sulfasalazine, *Kluyveromyces marxianus* A4 (Km A4), Km A4 plus sulfasalazine, *Saccharomyces boulardii* ATCC MYA-796 (Sb MYA-796), and Sb MYA-796 plus sulfasalazine.

| Groups | Day 0                  | Day 1                    | Day 2                    | Day 3                    | Day 4                    | Day 5                    | Day 6                     | Day 7                     | Day 8                     | Day 9                     | Day 10                     | Day 11                     | Day 12                     | Day 13                     | Day 14                     |
|--------|------------------------|--------------------------|--------------------------|--------------------------|--------------------------|--------------------------|---------------------------|---------------------------|---------------------------|---------------------------|----------------------------|----------------------------|----------------------------|----------------------------|----------------------------|
| CON    | 0.0 ± 0.0 <sup>a</sup> | 0.01 ± 0.12 <sup>a</sup> | 0.20 ± 0.15 <sup>a</sup> | 0.65 ± 0.09 <sup>a</sup> | 0.83 ± 0.14 <sup>a</sup> | 1.09 ± 0.16 <sup>a</sup> | 1.53 ± 0.16 <sup>a</sup>  | 1.58 ± 0.10 <sup>a</sup>  | 1.98 ± 0.10 <sup>a</sup>  | 1.35 ± 0.19 <sup>a</sup>  | 1.48 ± 0.18 <sup>a</sup>   | 1.40 ± 0.19 <sup>a</sup>   | 1.56 ± 0.16 <sup>a</sup>   | 1.64 ± 0.19 <sup>a</sup>   | 1.86 ± 0.18 <sup>a</sup>   |
| DSS    | 0.0 ± 0.0 <sup>a</sup> | 0.35 ± 0.14 <sup>a</sup> | 0.38 ± 0.18 <sup>a</sup> | 1.11 ± 0.20 <sup>a</sup> | 0.85 ± 0.21 <sup>a</sup> | 0.70 ± 0.17 <sup>a</sup> | 0.04 ± 0.11 <sup>a</sup>  | -1.50 ± 0.21 <sup>b</sup> | -2.84 ± 0.27 <sup>b</sup> | -3.65 ± 0.28 <sup>b</sup> | -4.29 ± 0.41 <sup>c</sup>  | -3.19 ± 0.70 <sup>b</sup>  | -2.24 ± 0.77 <sup>b</sup>  | -1.88 ± 0.70 <sup>b</sup>  | -1.09 ± 0.62 <sup>b</sup>  |
| S      | 0.0 ± 0.0 <sup>a</sup> | 0.13 ± 0.08 <sup>a</sup> | 0.51 ± 0.14 <sup>a</sup> | 1.09 ± 0.18 <sup>a</sup> | 0.99 ± 0.17 <sup>a</sup> | 0.86 ± 0.19 <sup>a</sup> | 0.24 ± 0.17 <sup>a</sup>  | -1.16 ± 0.13 <sup>b</sup> | -2.38 ± 0.52 <sup>b</sup> | -2.93 ± 0.44 <sup>b</sup> | -3.10 ± 0.70 <sup>bc</sup> | -1.89 ± 0.76 <sup>b</sup>  | -1.18 ± 0.83 <sup>ab</sup> | -0.90 ± 0.64 <sup>b</sup>  | -0.31 ± 0.51 <sup>ab</sup> |
| A4     | 0.0 ± 0.0 <sup>a</sup> | 0.14 ± 0.12 <sup>a</sup> | 0.39 ± 0.10 <sup>a</sup> | 0.86 ± 0.23 <sup>a</sup> | 0.85 ± 0.23 <sup>a</sup> | 0.81 ± 0.28 <sup>a</sup> | 0.24 ± 0.38 <sup>a</sup>  | -0.86 ± 0.47 <sup>b</sup> | -2.14 ± 0.42 <sup>b</sup> | -3.00 ± 0.40 <sup>b</sup> | -2.86 ± 0.55 <sup>bc</sup> | -1.38 ± 0.51 <sup>b</sup>  | -0.39 ± 0.44 <sup>ab</sup> | -0.20 ± 0.52 <sup>ab</sup> | 0.53 ± 0.40 <sup>ab</sup>  |
| A4+S   | 0.0 ± 0.0 <sup>a</sup> | 0.25 ± 0.15 <sup>a</sup> | 0.60 ± 0.11 <sup>a</sup> | 0.90 ± 0.12 <sup>a</sup> | 0.82 ± 0.17 <sup>a</sup> | 0.73 ± 0.33 <sup>a</sup> | -0.29 ± 0.38 <sup>a</sup> | -1.13 ± 0.43 <sup>b</sup> | -2.14 ± 0.21 <sup>b</sup> | -2.51 ± 0.20 <sup>b</sup> | -1.56 ± 0.41 <sup>b</sup>  | -0.48 ± 0.50 <sup>ab</sup> | 0.11 ± 0.31 <sup>ab</sup>  | 0.23 ± 0.24 <sup>ab</sup>  | 0.79 ± 0.16 <sup>ab</sup>  |
| Sb     | 0.0 ± 0.0 <sup>a</sup> | 0.09 ± 0.12 <sup>a</sup> | 0.24 ± 0.18 <sup>a</sup> | 0.76 ± 0.15 <sup>a</sup> | 0.78 ± 0.22 <sup>a</sup> | 0.43 ± 0.18 <sup>a</sup> | -0.24 ± 0.32 <sup>a</sup> | -1.51 ± 0.45 <sup>b</sup> | -2.56 ± 0.57 <sup>b</sup> | -3.39 ± 0.45 <sup>b</sup> | -3.50 ± 0.56 <sup>bc</sup> | -2.13 ± 0.55 <sup>b</sup>  | -1.43 ± 0.64 <sup>b</sup>  | -0.96 ± 0.58 <sup>b</sup>  | -0.41 ± 0.52 <sup>ab</sup> |
| Sb+S   | 0.0 ± 0.0 <sup>a</sup> | 0.10 ± 0.11 <sup>a</sup> | 0.26 ± 0.15 <sup>a</sup> | 0.91 ± 0.16 <sup>a</sup> | 0.98 ± 0.15 <sup>a</sup> | 0.69 ± 0.17 <sup>a</sup> | -0.05 ± 0.24 <sup>a</sup> | -1.39 ± 0.39 <sup>b</sup> | -2.41 ± 0.34 <sup>b</sup> | -2.94 ± 0.39 <sup>b</sup> | -2.96 ± 0.51 <sup>bc</sup> | -1.39 ± 0.52 <sup>b</sup>  | -0.73 ± 0.46 <sup>ab</sup> | -0.14 ± 0.32 <sup>ab</sup> | 0.41 ± 0.30 <sup>ab</sup>  |

All data are expressed as the mean ± standard deviation (n = 8). Different letters in a column indicate significant differences ( $P < 0.05$ ), which were evaluated using a one-way analysis of variance followed by Tukey's test. **CON**, control (treated with sterilized saline after providing autoclaved tap water); **DSS**, DSS-induced model

(treated with sterilized saline after providing 3% DSS); **S**, sulfasalazine [treated with sulfasalazine (50 mg/kg/day) after providing 3% DSS]; **A4**, *K. marxianus* A4 (treated with  $1 \times 10^8$  CFU/mL of *K. marxianus* A4 after providing 3% DSS); **A4+S**, *K. marxianus* A4 plus sulfasalazine [treated with  $1 \times 10^8$  CFU/mL of *K. marxianus* A4 plus sulfasalazine (50 mg/kg/day) after providing 3% DSS]; **Sb**, *S. boulardii* ATCC MYA-796 (treated with  $1 \times 10^8$  CFU/mL of *S. boulardii* ATCC MYA-796 after providing 3% DSS); **Sb+S**, *S. boulardii* ATCC MYA-796 plus sulfasalazine [treated with  $1 \times 10^8$  CFU/mL of *S. boulardii* ATCC MYA-796 plus sulfasalazine (50 mg/kg/day) after providing 3% DSS].

**ESI File 5.** Significant relative taxonomy abundance ratio of the gut microbiota in mice with dextran sulfate sodium (DSS)-induced colitis treated with sterilized saline, sulfasalazine, *Kluyveromyces marxianus* A4 plus sulfasalazine, and *Saccharomyces boulardii* ATCC MYA-796 plus sulfasalazine at the phylum, class, order, family, and genus levels via 16S rDNA amplicon-based community analysis.

| Biological taxonomy classification |                    | Experimental groups        |                           |                             |                             |                             |
|------------------------------------|--------------------|----------------------------|---------------------------|-----------------------------|-----------------------------|-----------------------------|
|                                    |                    | CON                        | DSS                       | S                           | A4+S                        | Sb+S                        |
| Phylum                             | Bacteroidota       | 81.98 ± 12.20 <sup>a</sup> | 34.75 ± 6.50 <sup>b</sup> | 54.06 ± 15.02 <sup>ab</sup> | 74.63 ± 10.65 <sup>a</sup>  | 68.64 ± 17.41 <sup>ab</sup> |
|                                    | Firmicutes         | 16.93 ± 12.08 <sup>b</sup> | 63.35 ± 6.44 <sup>a</sup> | 41.54 ± 14.01 <sup>ab</sup> | 19.75 ± 15.53 <sup>b</sup>  | 29.95 ± 17.93 <sup>ab</sup> |
| Class                              | Bacteroidia        | 81.98 ± 12.20 <sup>a</sup> | 34.75 ± 6.50 <sup>b</sup> | 54.06 ± 15.02 <sup>ab</sup> | 74.63 ± 10.65 <sup>a</sup>  | 68.64 ± 17.41 <sup>ab</sup> |
|                                    | Clostridia         | 15.87 ± 12.25 <sup>b</sup> | 60.87 ± 5.12 <sup>a</sup> | 40.80 ± 13.11 <sup>ab</sup> | 18.92 ± 16.04 <sup>b</sup>  | 29.61 ± 18.07 <sup>ab</sup> |
| Order                              | Bacteroidales      | 81.98 ± 12.20 <sup>a</sup> | 34.74 ± 6.51 <sup>b</sup> | 54.06 ± 15.02 <sup>ab</sup> | 74.63 ± 10.65 <sup>a</sup>  | 68.64 ± 17.41 <sup>ab</sup> |
|                                    | Oscillospirales    | 5.14 ± 5.55 <sup>b</sup>   | 18.53 ± 1.73 <sup>a</sup> | 14.07 ± 0.86 <sup>ab</sup>  | 6.29 ± 6.28 <sup>ab</sup>   | 12.28 ± 5.58 <sup>ab</sup>  |
|                                    | Lachnospirales     | 7.33 ± 7.36 <sup>b</sup>   | 29.62 ± 2.87 <sup>a</sup> | 16.67 ± 8.59 <sup>ab</sup>  | 8.50 ± 6.70 <sup>b</sup>    | 13.76 ± 11.05 <sup>ab</sup> |
|                                    | Acholeplasmatales  | 0.00 ± 0.00 <sup>b</sup>   | 2.31 ± 2.41 <sup>a</sup>  | 0.00 ± 0.00 <sup>b</sup>    | 0.00 ± 0.00 <sup>b</sup>    | 0.00 ± 0.00 <sup>b</sup>    |
| Family                             | Bacteroidaceae     | 60.62 ± 9.45 <sup>a</sup>  | 7.06 ± 1.25 <sup>c</sup>  | 24.47 ± 6.24 <sup>bc</sup>  | 46.98 ± 11.80 <sup>ab</sup> | 42.93 ± 14.22 <sup>ab</sup> |
|                                    | Rikenellaceae      | 6.60 ± 2.33 <sup>a</sup>   | 1.12 ± 0.97 <sup>b</sup>  | 2.57 ± 1.10 <sup>ab</sup>   | 3.60 ± 0.94 <sup>ab</sup>   | 3.69 ± 3.02 <sup>ab</sup>   |
|                                    | Oscillospiraceae   | 3.09 ± 2.82 <sup>b</sup>   | 13.59 ± 1.21 <sup>a</sup> | 6.89 ± 0.80 <sup>b</sup>    | 3.63 ± 3.79 <sup>b</sup>    | 5.12 ± 1.88 <sup>b</sup>    |
|                                    | Lachnospiraceae    | 7.33 ± 7.36 <sup>b</sup>   | 29.62 ± 2.87 <sup>a</sup> | 16.67 ± 8.59 <sup>ab</sup>  | 8.50 ± 6.70 <sup>b</sup>    | 13.76 ± 11.05 <sup>ab</sup> |
| Genus                              | <i>Bacteroides</i> | 60.62 ± 9.45 <sup>a</sup>  | 7.06 ± 1.25 <sup>c</sup>  | 24.47 ± 6.24 <sup>bc</sup>  | 46.98 ± 11.80 <sup>ab</sup> | 42.93 ± 14.22 <sup>ab</sup> |
|                                    | <i>Alistipes</i>   | 6.60 ± 2.33 <sup>a</sup>   | 0.00 ± 0.00 <sup>b</sup>  | 2.12 ± 1.86 <sup>ab</sup>   | 3.60 ± 0.94 <sup>ab</sup>   | 3.11 ± 3.68 <sup>ab</sup>   |
|                                    | Unclassified       | 9.13 ± 3.08 <sup>b</sup>   | 20.98 ± 1.16 <sup>a</sup> | 22.49 ± 4.27 <sup>a</sup>   | 16.08 ± 3.59 <sup>ab</sup>  | 19.24 ± 7.30 <sup>ab</sup>  |

|        |                          |                           |                           |                           |                           |
|--------|--------------------------|---------------------------|---------------------------|---------------------------|---------------------------|
| Others | 7.30 ± 3.20 <sup>b</sup> | 21.88 ± 3.68 <sup>a</sup> | 16.70 ± 5.00 <sup>a</sup> | 9.10 ± 5.37 <sup>ab</sup> | 9.79 ± 4.10 <sup>ab</sup> |
|--------|--------------------------|---------------------------|---------------------------|---------------------------|---------------------------|

The relative taxonomy abundance ratio is expressed as a percentage and shown as the mean ± standard deviation (n = 3). Different letters in a row indicate significant differences ( $P < 0.05$ ) using a one-way analysis of variance followed by Tukey's test or Kruskal–Wallis test followed by Dunn's test and Bonferroni correction. **CON**, control (treated with sterilized saline after providing autoclaved tap water); **DSS**, DSS-induced model (treated with sterilized saline after providing 3% DSS); **S**, sulfasalazine [treated with sulfasalazine (50 mg/kg/day) after providing 3% DSS]; **A4+S**, *K. marxianus* A4 plus sulfasalazine [treated with  $1 \times 10^8$  CFU/mL of *K. marxianus* A4 plus sulfasalazine (50 mg/kg/day) after providing 3% DSS]; **Sb+S**, *S. boulardii* ATCC MYA-796 plus sulfasalazine [treated with  $1 \times 10^8$  CFU/mL of *S. boulardii* ATCC MYA-796 plus sulfasalazine (50 mg/kg/day) after providing 3% DSS].

## References

1. F. I. Kostadinova, T. Baba, Y. Ishida, T. Kondo, B. K. Popivanova and N. Mukaida, *J. Leukoc. Biol.*, 2010, **88**, 133–143.
